# Supplementary material for: Monitoring Repair of UV-Induced 6-4-Photoproducts with a Purified DDB2 Protein Complex
Source: PubMed Central journal article supplement (PMC3904869; doi:10.1371/journal.pone.0085896), 2014-01-28

**Figure S1**

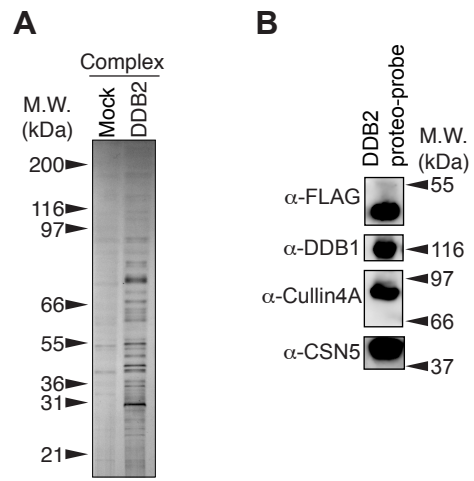

Supplement: pone.0085896.s001.pdf [file pone.0085896.s001.pdf]
